# Supplementary material for: Interventions for and experiences of shared decision-making underpinning reproductive health, family planning options and pregnancy for women with or at high risk of kidney disease: a systematic review and qualitative framework synthesis
Source: HighWire-hosted journal article supplement (doi:10.1136/bmjopen-2022-062392), 2022-08-01
Supplement: bmjopen-2022-062392supp002_data_supplement.pdf [file bmjopen-2022-062392supp002_data_supplement.pdf]

## CASP quality assessment of included papers

| <i>Authors (year)</i>   | <i>Clear statement of research aims?</i> | <i>Qualitative methodology appropriate?</i> | <i>Is it worth continuing?</i> | <i>Research design appropriate to address aims?</i> | <i>Recruitment strategy appropriate for aims?</i> | <i>Did data collection address research issue?</i> | <i>Relationship between researcher and participants considered?</i> | <i>Ethical issues considered?</i> | <i>Rigorous data analysis?</i> | <i>Clear statement of findings?</i> | <i>Research is valuable?</i> | <i>Assessment of methodological concerns</i>                 |
|-------------------------|------------------------------------------|---------------------------------------------|--------------------------------|-----------------------------------------------------|---------------------------------------------------|----------------------------------------------------|---------------------------------------------------------------------|-----------------------------------|--------------------------------|-------------------------------------|------------------------------|--------------------------------------------------------------|
| Beanlands et al. (2020) | Yes                                      | Yes                                         | Yes                            | Yes                                                 | Yes                                               | Yes                                                | Can't tell                                                          | Yes                               | Yes                            | Yes                                 | Very valuable                | No concerns                                                  |
| Chuang et al. (2010)    | Yes                                      | Yes                                         | Yes                            | Yes                                                 | Yes                                               | Yes                                                | Can't tell                                                          | Yes                               | Yes                            | Yes                                 | Very valuable                | No concerns                                                  |
| Clarke et al. (2010)    | Yes                                      | Yes                                         | Yes                            | Yes                                                 | Yes                                               | Yes                                                | Can't tell                                                          | Yes                               | Yes                            | Yes                                 | Low                          | No concerns                                                  |
| Corbin (2009)           | Yes                                      | Yes                                         | Yes                            | Yes                                                 | Yes                                               | Yes                                                | Can't tell                                                          | No                                | Yes                            | Yes                                 | Valuable                     | Minor concerns, researcher reflexivity not reported.         |
| Crowley-Matoka (2004)   | Yes                                      | Yes                                         | Yes                            | Yes                                                 | Can't tell                                        | Yes                                                | No                                                                  | No                                | Can't tell                     | No                                  | Very valuable                | Minor concerns, researcher reflexivity and bias in reporting |
| Evans (2003)            | Yes                                      | Yes                                         | Yes                            | Yes                                                 | Yes                                               | Yes                                                | Yes                                                                 | Yes                               | Unclear                        | Yes                                 | Valuable                     | Minor concerns, PhD no methods chapter.                      |
| Fatani (2008)           | Yes                                      | Yes                                         | Yes                            | Yes                                                 | Yes                                               | Yes                                                | Yes                                                                 | Yes                               | Yes                            | Yes                                 | Valuable                     | No concerns                                                  |
| Hollingsworth (2006)    | Yes                                      | Yes                                         | Yes                            | Yes                                                 | Yes                                               | Yes                                                | Yes                                                                 | Yes                               | Yes                            | Yes                                 | Very valuable                | No concerns                                                  |

|                         |            |     |     |     |     |     |            |     |     |     |               |             |
|-------------------------|------------|-----|-----|-----|-----|-----|------------|-----|-----|-----|---------------|-------------|
| Kazmerski et al. (2017) | Yes        | Yes | Yes | Yes | Yes | Yes | Can't tell | Yes | Yes | Yes | Very valuable | No concerns |
| Kerklaan et al. (2020)  | Yes        | Yes | Yes | Yes | Yes | Yes | Yes        | Yes | Yes | Yes | Very valuable | No concerns |
| Kurz (2018)             | Yes        | Yes | Yes | Yes | Yes | Yes | Can't tell | Yes | Yes | Yes | Very valuable | No concerns |
| Lippe et al. (2015)     | Yes        | Yes | Yes | Yes | Yes | Yes | Yes        | Yes | Yes | Yes | Low           | No concerns |
| Nazario et al. (2007)   | Yes        | Yes | Yes | Yes | Yes | Yes | Can't tell | Yes | Yes | Yes | Valuable      | No concerns |
| Phuti et al. (2019)     | Yes        | Yes | Yes | Yes | Yes | Yes | Yes        | Yes | Yes | Yes | Valuable      | No concerns |
| Schipper et al. (2016)  | Can't tell | Yes | Yes | Yes | Yes | Yes | Can't tell | Yes | Yes | Yes | Valuable      | No concerns |
| Thomas (2003)           | Yes        | Yes | Yes | Yes | Yes | Yes | Can't tell | Yes | Yes | Yes | Valuable      | No concerns |
| Tong et al. (2015)      | Yes        | Yes | Yes | Yes | Yes | Yes | Can't tell | No  | Yes | Yes | Very valuable | No concerns |
| Wiles et al. (2015)     | Yes        | Yes | Yes | Yes | Yes | Yes | No         | Yes | Yes | Yes | Valuable      | No concerns |
