# Supplementary material for: Interventions for and experiences of shared decision-making underpinning reproductive health, family planning options and pregnancy for women with or at high risk of kidney disease: a systematic review and qualitative framework synthesis
Source: HighWire-hosted journal article supplement (doi:10.1136/bmjopen-2022-062392), 2022-08-01
Supplement: bmjopen-2022-062392supp003_data_supplement.pdf [file bmjopen-2022-062392supp003_data_supplement.pdf]

## Included studies on women with kidney disease and at risk of kidney disease

| <i>Authors</i>                                                                                                                                                                                            | <i>Publication Date</i> | <i>Country</i>                                     | <i>Study Design</i>                                                                                                | <i>Aim</i>                                                                                                                                                     | <i>Sample size</i>                                                                                                                                | <i>Age</i>                     |
|-----------------------------------------------------------------------------------------------------------------------------------------------------------------------------------------------------------|-------------------------|----------------------------------------------------|--------------------------------------------------------------------------------------------------------------------|----------------------------------------------------------------------------------------------------------------------------------------------------------------|---------------------------------------------------------------------------------------------------------------------------------------------------|--------------------------------|
| Megan Crowley-Matoka                                                                                                                                                                                      | 2005                    | Mexico                                             | Qualitative study using daily observations and informal interviews and 50 taped in-depth interviews                | To explore patients' transplant trajectories as they move from learning to desire a transplant to actually receiving one and living with it over the long term | 22 female and 28 male participants                                                                                                                | 17-62                          |
| Jasmijn Kerklaan, Elyssa Hannan, Camilla Hanson, Chandana Guha, Yeoungjee Cho, Martin Christian, Lorraine Hamiwka, Jessica Ryan, Aditi Sinha, Germaine Wong, Jonathan Craig, Jaap Groothoff, Allison Tong | 2020                    | Australia, UK, Canada, India, The Netherlands, USA | Qualitative interview study                                                                                        | To describe the perspectives on life participation by young adults with childhood-onset chronic kidney disease (CKD)                                           | 20 female and 10 male participants                                                                                                                | 18-35                          |
| Heather Beanlands, Elizabeth McCay, Sheryll Pahati, and Michelle A. Hladunewich                                                                                                                           | 2020                    | Canada                                             | Qualitative study with focus group discussions guided by semi-structured interviews (qualitative content analysis) | To explore the experiences of young women living with CKD                                                                                                      | 11 female participants                                                                                                                            | 18-40                          |
| K. Schipper*, W. E. van der Borg, J. de Jong-Camerik and T. A. Abma                                                                                                                                       | 2016                    | The Netherlands                                    | Qualitative study with interviews (n=31) and focus groups (10 participants)                                        | To gain insight into patients' everyday problems                                                                                                               | 19 female participants in interviews (31 female and male participants), 10 participants in focus groups (mixed, 5 female and 5 male participants) | 18-65 (interview participants) |
| Jane M. Kurz                                                                                                                                                                                              | 2018                    | USA                                                | Mixed methods with audiotaped telephone interviews and a written survey measuring social support                   | To explore reproductive decision-making process with women organ transplant recipients                                                                         | 7 female participants/renal transplant recipients                                                                                                 | 21-42                          |

|                                                                                                                      |      |              |                                                                                                                  |                                                                                                                                                                                                                                                      |                                                                                 |                                       |
|----------------------------------------------------------------------------------------------------------------------|------|--------------|------------------------------------------------------------------------------------------------------------------|------------------------------------------------------------------------------------------------------------------------------------------------------------------------------------------------------------------------------------------------------|---------------------------------------------------------------------------------|---------------------------------------|
| Kate S Wiles, Kate Bramham, Alina Vais, Kate R Harding, Paramit Chowdhury, Cath J Taylor and Catherine Nelson-Piercy | 2015 | UK           | Questionnaire study with analysis of descriptive data and free text data using thematic content analysis methods | To examine experiences of women with CKD attending pre-pregnancy counselling and evaluate their pregnancy outcomes                                                                                                                                   | 72 questionnaire female participants with free text evaluation                  | 21-46                                 |
| Allison Tong, Mark A. Brown, Wolfgang C. Winkelmayr, Jonathan C. Craig, and Shilpanjali Jesudason                    | 2015 | Australia    | Qualitative interview study                                                                                      | To describe the beliefs, values, and experiences of pregnancy in women with CKD to inform pre-pregnancy counselling and pregnancy care                                                                                                               | 41 female participants                                                          | 22 to 56                              |
| Roberta de Carvalho Pinto Nazario, Egberto Ribeiro Turato                                                            | 2007 | Brazil       | Qualitative interview study using psychodynamic approaches for interpretation                                    | To explore haemodialysis experiences in terms of meanings women attribute to pregnancy and motherhood                                                                                                                                                | 9 female participants on haemodialysis                                          | Childbearing age                      |
| Angus Clarke, Srikant Sarangi, Kate Verrier-Jones                                                                    | 2011 | UK           | Qualitative study that uses rhetorical discourse analysis to analyse audio-recorded genetic consultations        | To explore accounting practices of parents in genetic consultations, focusing on articulating responsibility with regard to testing at-risk children for PKD and the communication issues surrounding testing process and disclosing of test results | 8 genetic consultations with mixed female and male participants/client families | unknown                               |
| Eiman Mohammad Saleh Fatani                                                                                          | 2008 | Saudi Arabia | PhD. Mixed method study with questionnaires and in-depth interviews                                              | To explore gender-related issues that affect the various aspects of chronically ill and disabled Saudi Arabian women's life                                                                                                                          | 50 female participants interviewed in in-depth interviews                       | 24-59                                 |
| Guy M. Hollingsworth                                                                                                 | 2006 | USA          | PhD. Qualitative study using a mixed classical and interpretative biographical approach                          | To understand living with a chronic illness and kidney transplant and efforts to                                                                                                                                                                     | 1 female participants who is wife and mother                                    | 45-50 (covering a 23-year experience) |

|  |  |  |  |                                                                                                         |  |  |
|--|--|--|--|---------------------------------------------------------------------------------------------------------|--|--|
|  |  |  |  | address associated challenges and to improve individual worth through ongoing lifelong learning process |  |  |
|--|--|--|--|---------------------------------------------------------------------------------------------------------|--|--|

### Women at risk of kidney disease

| <i>Authors</i>                                                                      | <i>Publication Date</i> | <i>Country</i> | <i>Study Design</i>                                          | <i>Aim</i>                                                                                                                                                                | <i>Sample</i>                                                                                                                                                              | <i>Age</i> |
|-------------------------------------------------------------------------------------|-------------------------|----------------|--------------------------------------------------------------|---------------------------------------------------------------------------------------------------------------------------------------------------------------------------|----------------------------------------------------------------------------------------------------------------------------------------------------------------------------|------------|
| Traci M. Kazmerski, Theresa Gmelin, Breonna Slocum, Sonya Borrero, Elizabeth Miller | 2016                    | USA            | Qualitative interview study                                  | To explore attitudes and decision making regarding pregnancy among young women with CF                                                                                    | 22 female participants recruited with Cystic Fibrosis                                                                                                                      | 18-30      |
| Cynthia H. Chuang, Diana L. Velott, Carol S. Weisman                                | 2010                    | USA            | Qualitative study with focus groups                          | To explore intention for future pregnancy, preconception health optimization, perceived risk of adverse pregnancy outcomes, and contraceptive beliefs                     | 72 non-pregnant female participants stratified by chronic condition (16 women with diabetes, 16 women with hypertension, 40 women with obesity) and by previous live birth | 18-45      |
| Juliet M. Corbin                                                                    | 1987                    | USA            | Exploratory longitudinal study with four in-depth interviews | To address how a group of chronically ill pregnant women managed the medical risk factors associated with their pregnancies through a process termed protective governing | 11 female participants with Diabetes/Lupus/hypertension                                                                                                                    | 22-38      |

|                                                                              |      |              |                                                                                                                  |                                                                                                                              |                                                                      |                                              |
|------------------------------------------------------------------------------|------|--------------|------------------------------------------------------------------------------------------------------------------|------------------------------------------------------------------------------------------------------------------------------|----------------------------------------------------------------------|----------------------------------------------|
| A. Phuti, M. Schneider, K. Maken, M. Tikly and B. Hodkinson                  | 2019 | South Africa | Qualitative interview study exploring their physical concerns, emotional health, sexual well-being and fertility | To explore living experiences, perceptions and unmet needs of South African patients with systemic lupus erythematosus (SLE) | 25 female participants with SLE                                      | 22-45                                        |
| Charlotte von der Lippe & Jan C. Frich & Anna Harris & Kari Nyheim Solbrække | 2016 | Norway       | Qualitative study with semi-structured interviews                                                                | To explore women's experiences of being heterozygous for Fabry disease                                                       | 10 female participants heterozygous for Fabry disease                | 24-77                                        |
| Hilary Thomas                                                                | 2003 | UK           | Qualitative in-depth interview study                                                                             | To explore a neglected area of women's reproductive experience, namely major illness during pregnancy                        | 4 female participants with diabetes, 3 with gestational diabetes     | Unknown: women with experiences of pregnancy |
| Marilyn Kathleen Evans                                                       | 2003 | Canada       | PhD. Qualitative study with conversational interviews                                                            | To gain an in-depth understanding of GDM as pregnant women meaningfully experience it                                        | 12 female participants who had gestational diabetes during pregnancy | 23-38                                        |

Key – blue highlight a PhD thesis.
